# Supplementary material for: Synthesis of New Derivatives of Berberine Canagliflozin and Study of Their Antibacterial Activity and Mechanism
Source: MDPI journal article supplement (doi:10.3390/molecules29010273), 2024-01-04
Supplement: s1 [file s1]

# Synthesis of new derivatives of berberine canagliflozin and study on their antibacterial activity and mechanism

Jinsheng Li <sup>1,2,3</sup>, Xueli Hou <sup>1,2,3</sup>, Jinlong Xiao <sup>2,3</sup>, Li Zhu <sup>2,3</sup>, Yujie Deng <sup>2,3</sup>, Ziyi Li <sup>2,3</sup>, Zijian Zhao <sup>1,2,3,\*</sup>, Zhenghong Luo <sup>2,3,\*</sup> and Hao Wei <sup>1,2</sup>

<sup>1</sup> Department of Pharmacology, Shaanxi University of Chinese Medicine, Xianyang 712046, China; jsli1006@163.com (J.L.); xlhou199885@163.com (X.H.); weihao217@163.com (H.W.)

<sup>2</sup> School of Chemistry and Materials Science, Huaihua University, Huaihua 418000, China; jlxiao0204@163.com (J.X.); lizzzz082803@163.com (L.Z.); dyj20040128@163.com (Y.D.); zyli1202@163.com (Z.L.);

<sup>3</sup> Key Laboratory of Research and Utilization of Ethnomedicinal Plant Resources of Hunan Province, Huaihua University, Huaihua 418000, China

\* Correspondence: luozhenghong06@163.com (Z.L.); zzj@hhtc.edu.cn (Z.Z.)

## CATALOG

|                                                                                |   |
|--------------------------------------------------------------------------------|---|
| Figure S 1 <sup>1</sup> H NMR spectra of compound B9OC .....                   | 2 |
| Figure S 2 <sup>13</sup> C NMR spectra of compound B9OC .....                  | 2 |
| Figure S 3 MS spectra of compound B9OC .....                                   | 3 |
| Figure S 4 The purity of B9OC from HPLC .....                                  | 3 |
| Figure S 5 <sup>1</sup> H NMR spectra of compound Berberrubine .....           | 4 |
| Figure S 6 <sup>13</sup> C NMR spectra of compound Berberrubine .....          | 4 |
| Figure S 7 <sup>1</sup> H NMR spectra of compound Canagliflozin bromide .....  | 5 |
| Figure S 8 <sup>13</sup> C NMR spectra of compound Canagliflozin bromide ..... | 5 |
| Figure S 9 <sup>1</sup> H NMR spectra of compound B9OBU .....                  | 6 |
| Figure S 10 <sup>13</sup> C NMR spectra of compound B9OBU .....                | 6 |
| Figure S 11 <sup>1</sup> H NMR spectra of compound BBR .....                   | 7 |
| Figure S 12 <sup>13</sup> C NMR spectra of compound BBR.....                   | 7 |
| Figure S 13 Western blot images for PBS-B9OC .....                             | 8 |
| Figure S 14 Western blot images for PBS-BBR-CAN-BBR+CAN .....                  | 8 |
| Figure S 15 ADMET Prediction of B9OC Based on Computer Aided .....             | 9 |

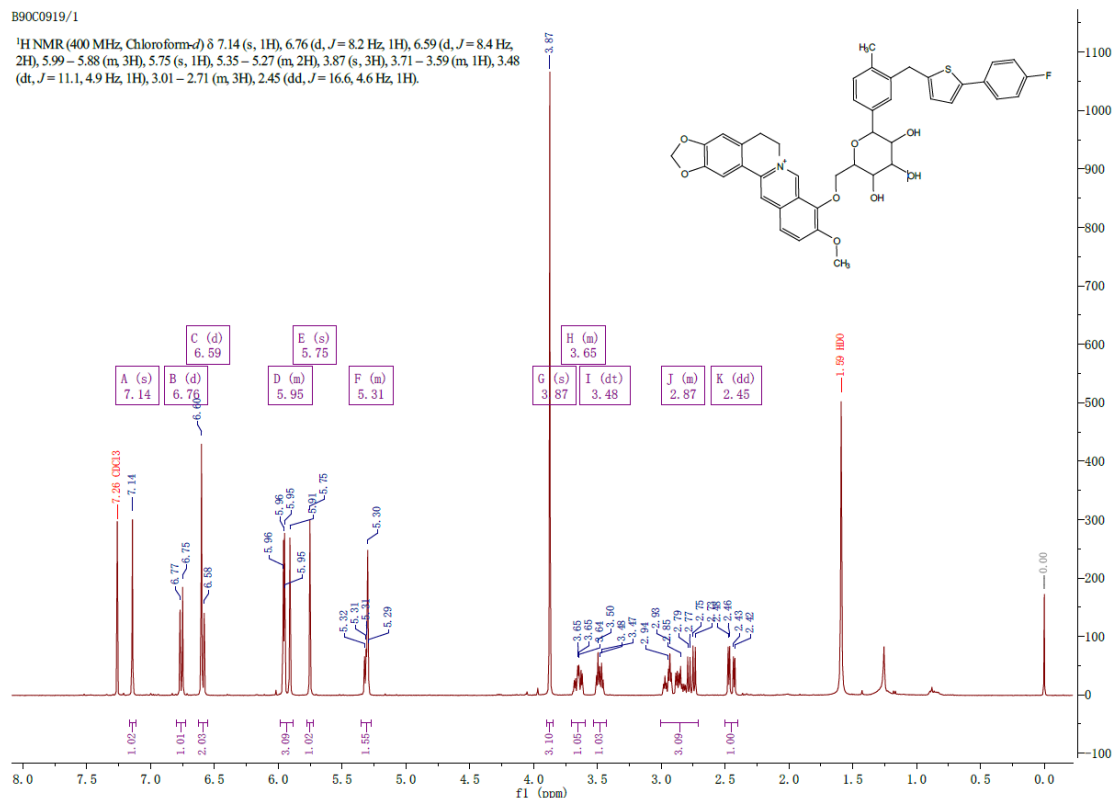

Figure S 1 <sup>1</sup>H NMR spectra of compound B9OC

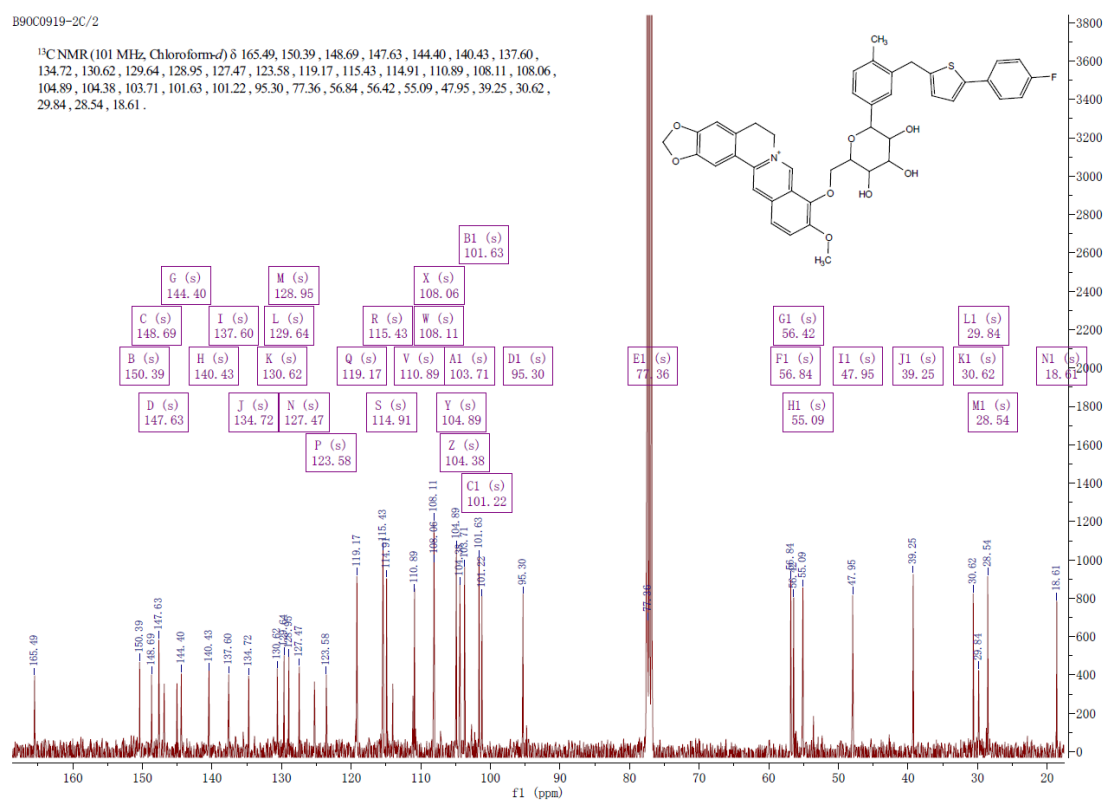

Figure S 2 <sup>13</sup>C NMR spectra of compound B9OC

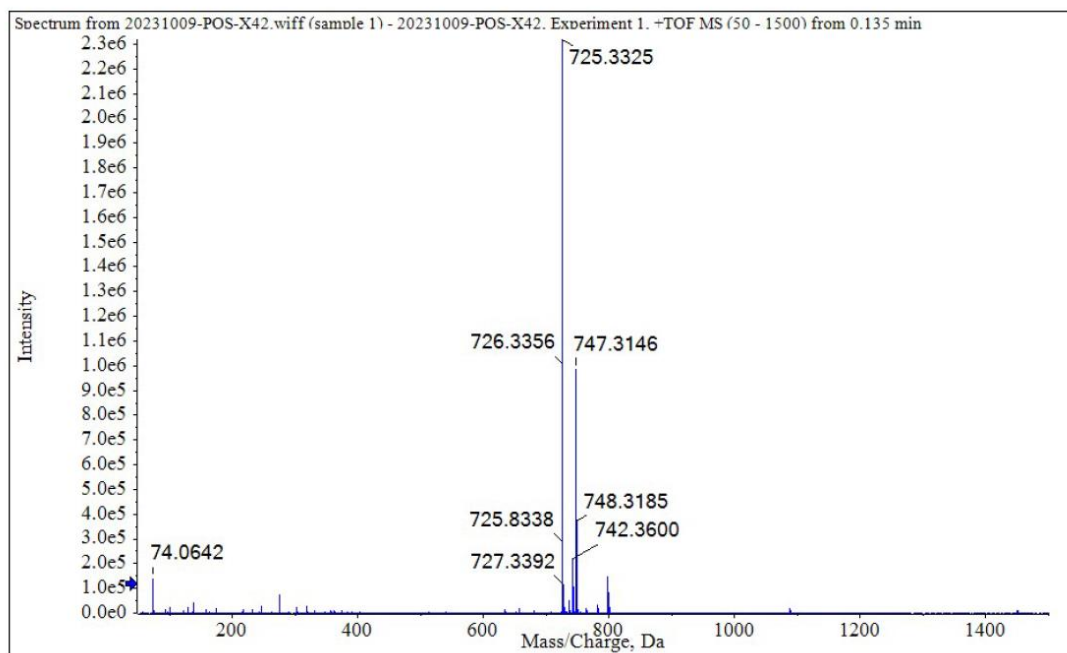

Figure S 3 MS spectra of compound B9OC

**SHIMADZU**  
**LabSolutions** Analysis report

<Sample Information>

Sample : b9oca365nm  
 Sample ID : 01  
 Inj. Volume : 10 uL  
 Acquisition Date : 2023/9/13 10:37:25

<Chromatogram>

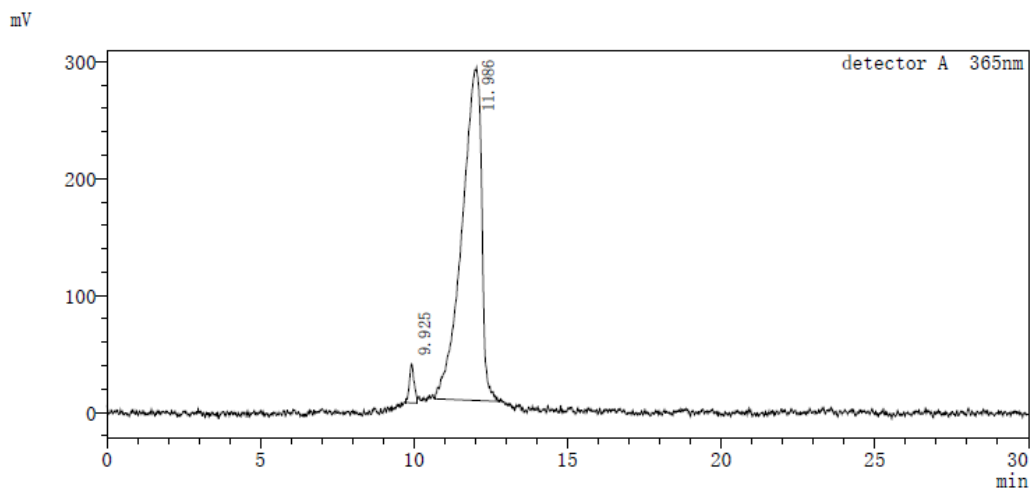

<Chromatogram peak table>

detector A 365nm

| number | retention time | peak area | hight  | concentration |
|--------|----------------|-----------|--------|---------------|
| 1      | 9.925          | 353117    | 32886  | 2.743 %       |
| 2      | 11.986         | 12519188  | 282176 | 97.257 %      |
| 总计     |                | 12872305  | 315063 |               |

Figure S 4 The purity of B9OC from HPLC

RB0705-2/1

$^1\text{H}$  NMR (400 MHz, Chloroform- $d$ )  $\delta$  9.18 (s, 1H), 7.56 (s, 1H), 7.24 (d,  $J = 7.5$  Hz, 2H), 6.75 (s, 1H), 6.48 (d,  $J = 7.9$  Hz, 1H), 6.06 (s, 2H), 4.40 (t,  $J = 6.1$  Hz, 2H), 3.89 (s, 3H), 3.08 (t,  $J = 6.1$  Hz, 2H), 2.44 (s, 1H).

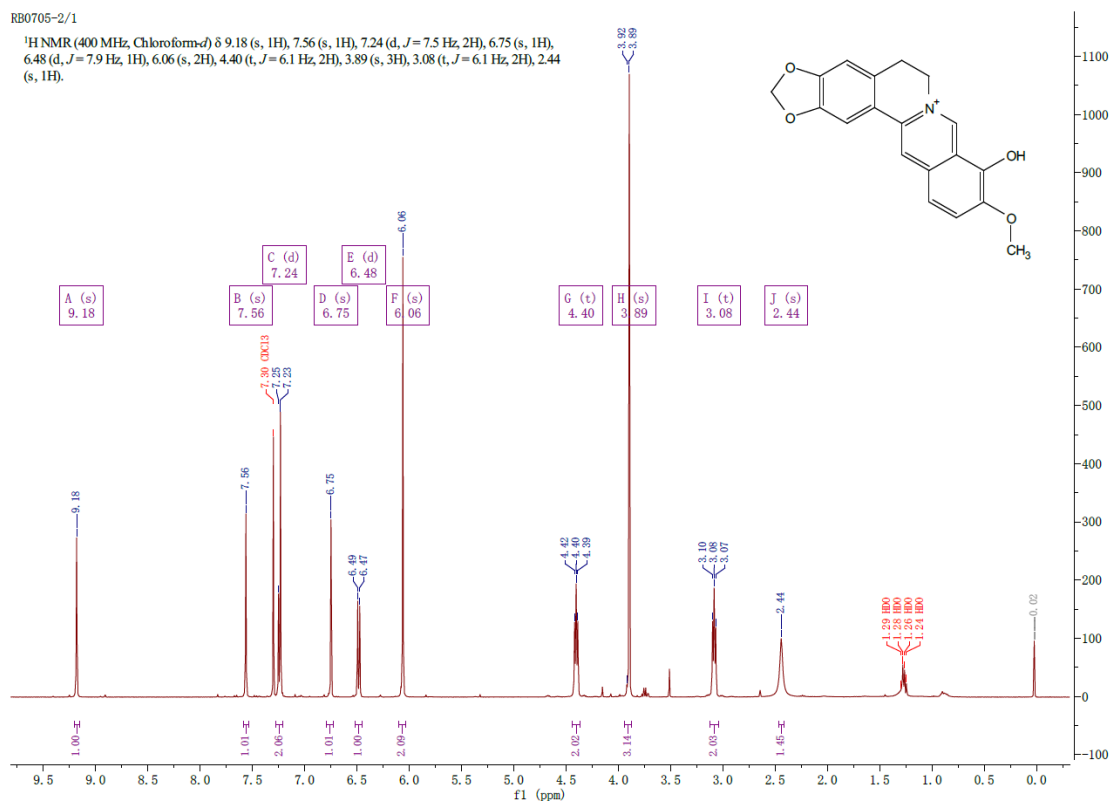Figure S 5  $^1\text{H}$  NMR spectra of compound **Berberrubine**

RB0705-2C/2

$^{13}\text{C}$  NMR (101 MHz, Chloroform- $d$ )  $\delta$  150.83, 149.07, 148.14, 145.77, 132.98, 131.36, 128.22, 122.22, 120.44, 120.09, 117.59, 108.41, 104.56, 102.97, 101.86, 77.36, 56.09, 53.33, 28.65.

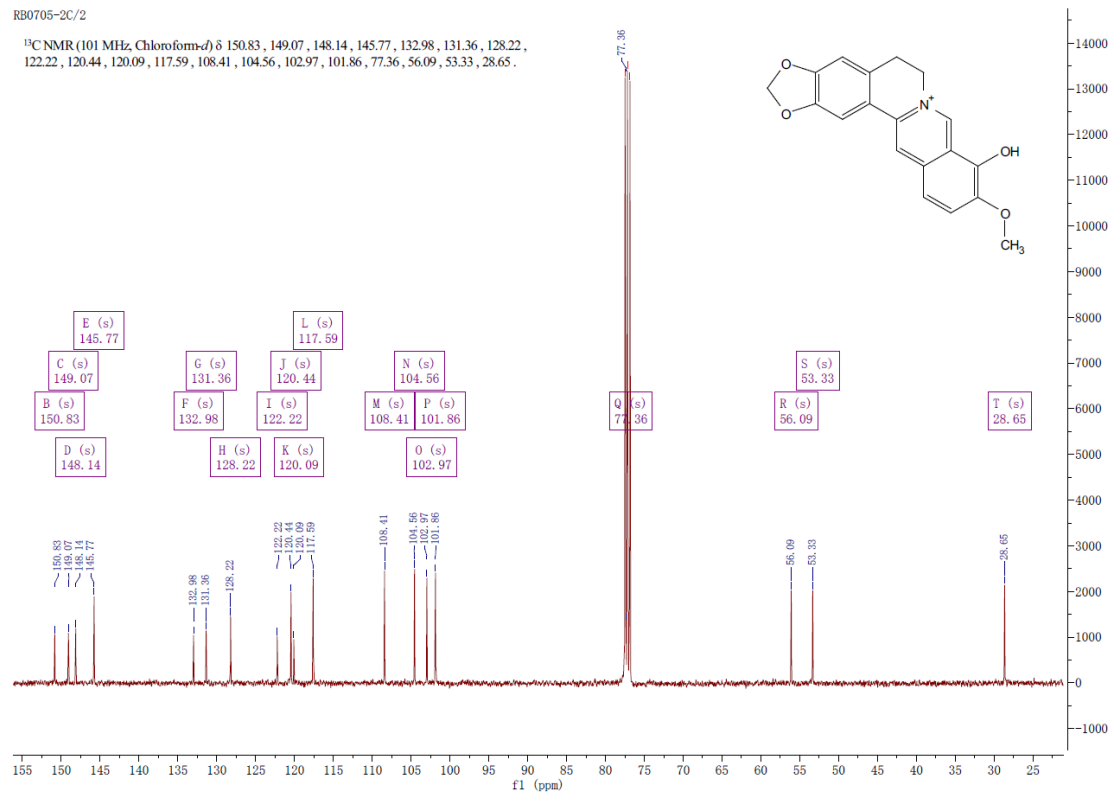Figure S 6  $^{13}\text{C}$  NMR spectra of compound **Berberrubine**

BRC0914/1

$^1\text{H}$  NMR (400 MHz, Chloroform- $d$ )  $\delta$  7.46–7.38 (m, 2H), 7.25–7.11 (m, 3H), 7.08–6.92 (m, 3H), 6.63 (d,  $J$  = 3.6 Hz, 1H), 5.30 (s, 2H), 4.43 (s, 1H), 4.15–4.07 (m, 3H), 4.02 (d,  $J$  = 12.4 Hz, 1H), 3.69–3.56 (m, 4H), 3.44 (dd,  $J$  = 8.7, 3.3 Hz, 2H), 3.07 (d,  $J$  = 3.7 Hz, 1H), 2.27 (s, 3H).

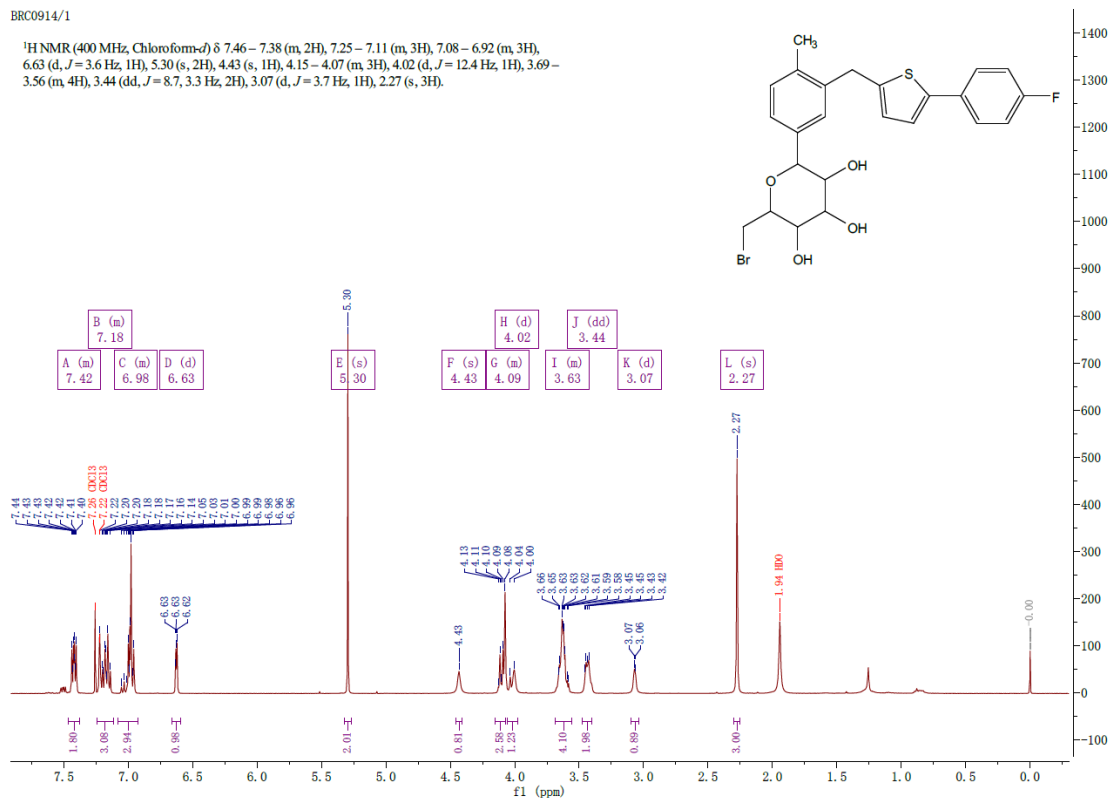Figure S 7  $^1\text{H}$  NMR spectra of compound Canagliflozin bromide

BRC0914C/2

$^{13}\text{C}$  NMR (101 MHz, Chloroform- $d$ )  $\delta$  143.05, 141.68, 138.57, 137.12, 135.95, 130.97, 130.81, 128.82, 127.26, 127.18, 126.18, 125.85, 122.85, 115.96, 115.74, 81.44, 77.72, 77.36, 75.32, 71.94, 53.58, 34.25, 33.65, 19.43.

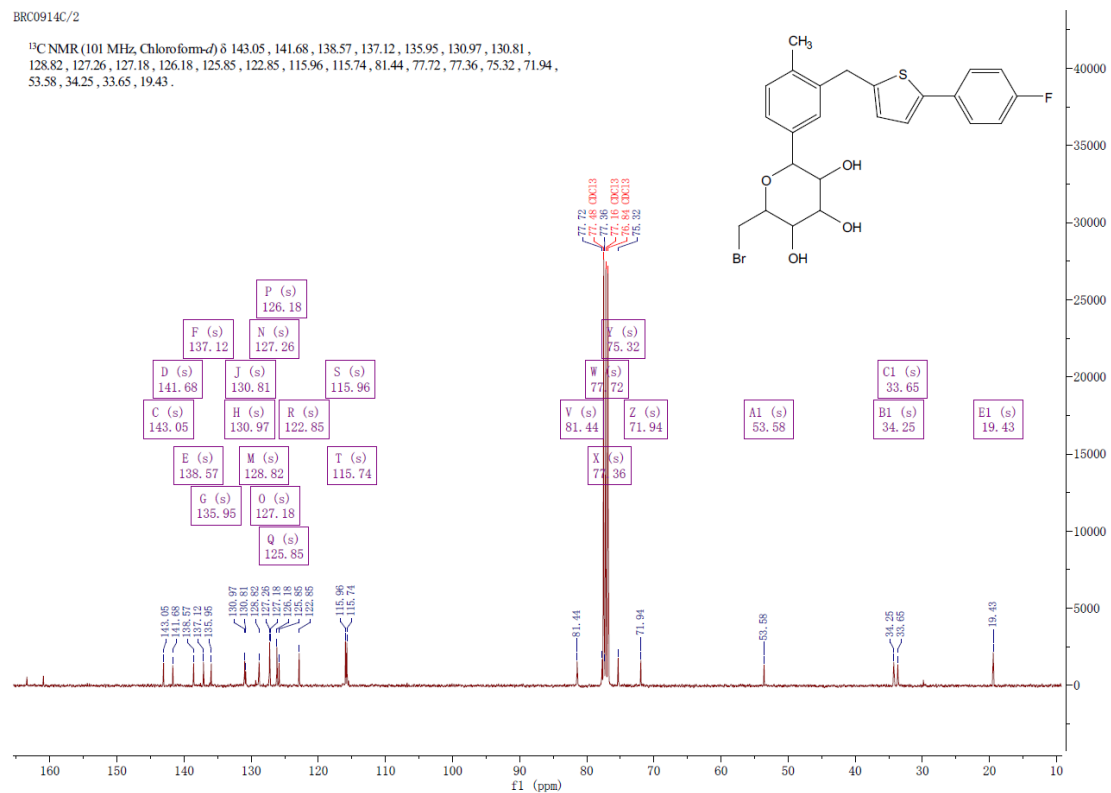Figure S 8  $^{13}\text{C}$  NMR spectra of compound Canagliflozin bromide

B90BU1020/1

$^1\text{H}$  NMR (400 MHz, Chloroform- $d$ )  $\delta$  10.29 (s, 1H), 8.36 (s, 1H), 7.91 (d,  $J$  = 9.0 Hz, 1H), 7.74 (d,  $J$  = 9.0 Hz, 1H), 7.36 (s, 1H), 6.77 (s, 1H), 6.04 (s, 2H), 5.32 (t,  $J$  = 6.3 Hz, 2H), 4.45 (t,  $J$  = 6.8 Hz, 2H), 4.01 (s, 3H), 3.31 (t,  $J$  = 6.3 Hz, 2H), 1.99 (p,  $J$  = 6.9 Hz, 3H), 1.57 (q,  $J$  = 7.5 Hz, 3H), 1.24 (s, 3H), 1.01 (t,  $J$  = 7.4 Hz, 4H).

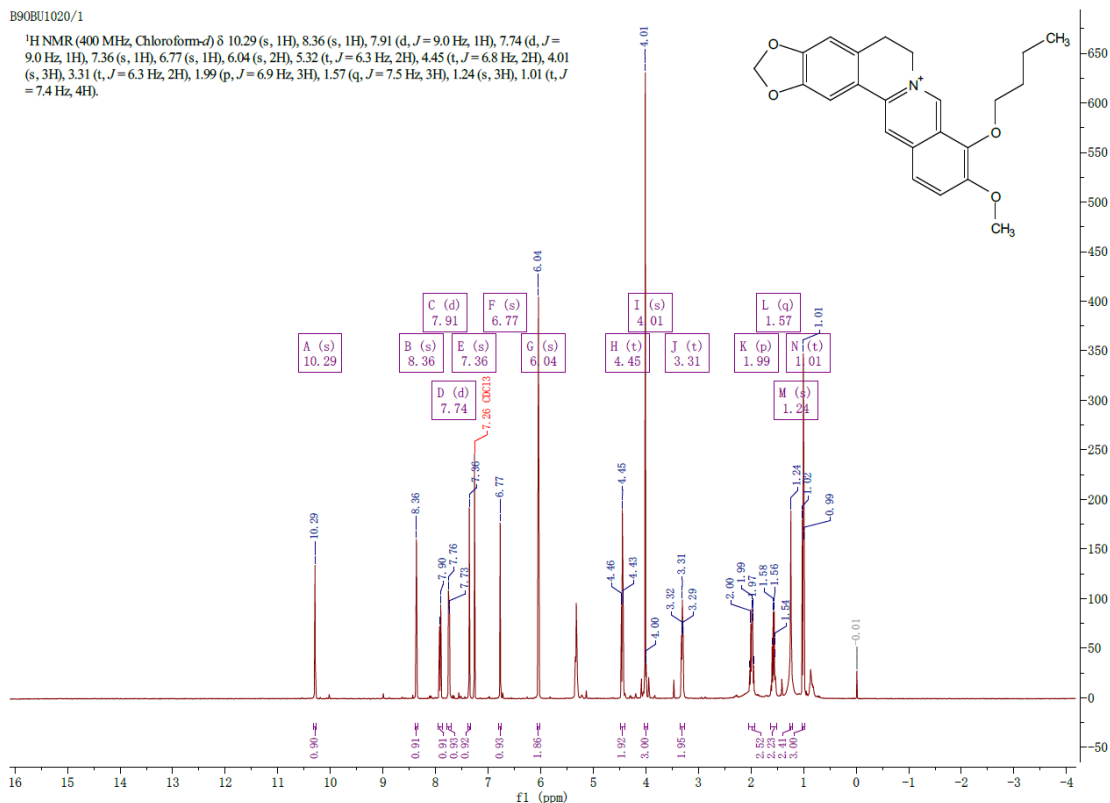

Figure S 9  $^1\text{H}$  NMR spectra of compound B90BU

B90BU1020C/2

$^{13}\text{C}$  NMR (101 MHz, Chloroform- $d$ )  $\delta$  150.75, 148.39, 146.76, 137.68, 133.48, 130.62, 126.11, 123.02, 122.49, 120.38, 119.85, 108.61, 105.42, 102.22, 77.36, 75.46, 57.09, 56.21, 32.33, 29.83, 27.79, 19.22, 14.09.

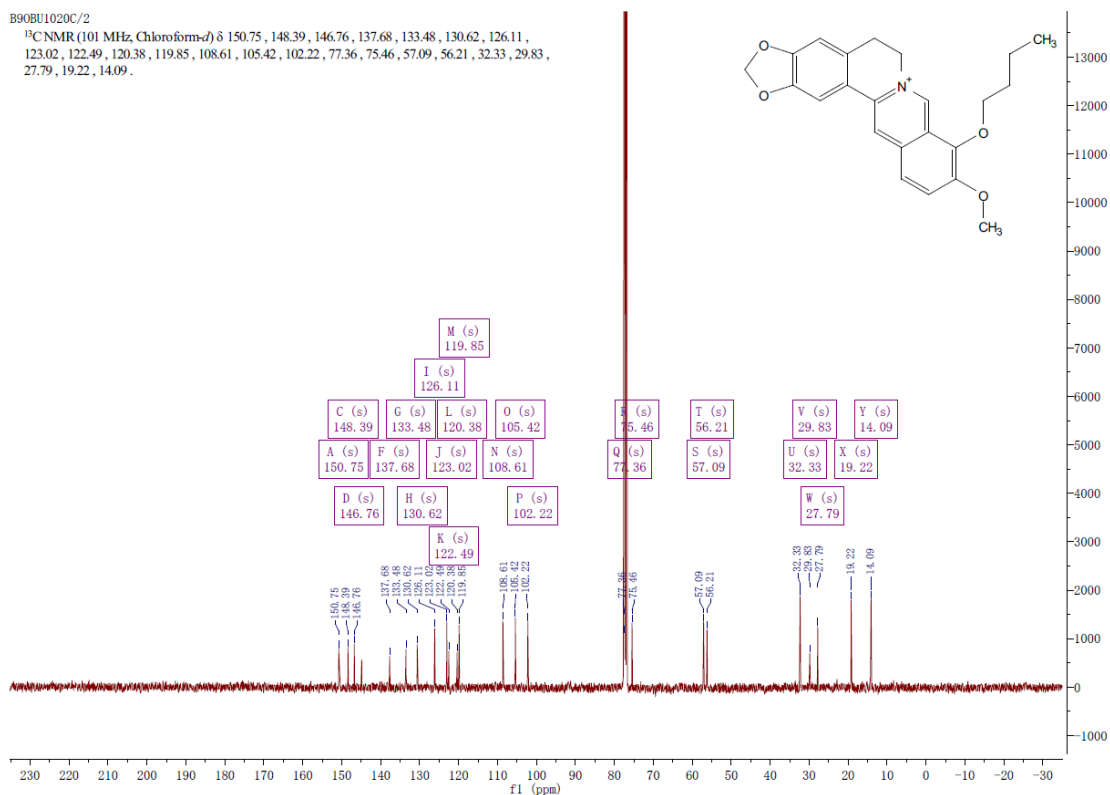

Figure S 10  $^{13}\text{C}$  NMR spectra of compound B90BU

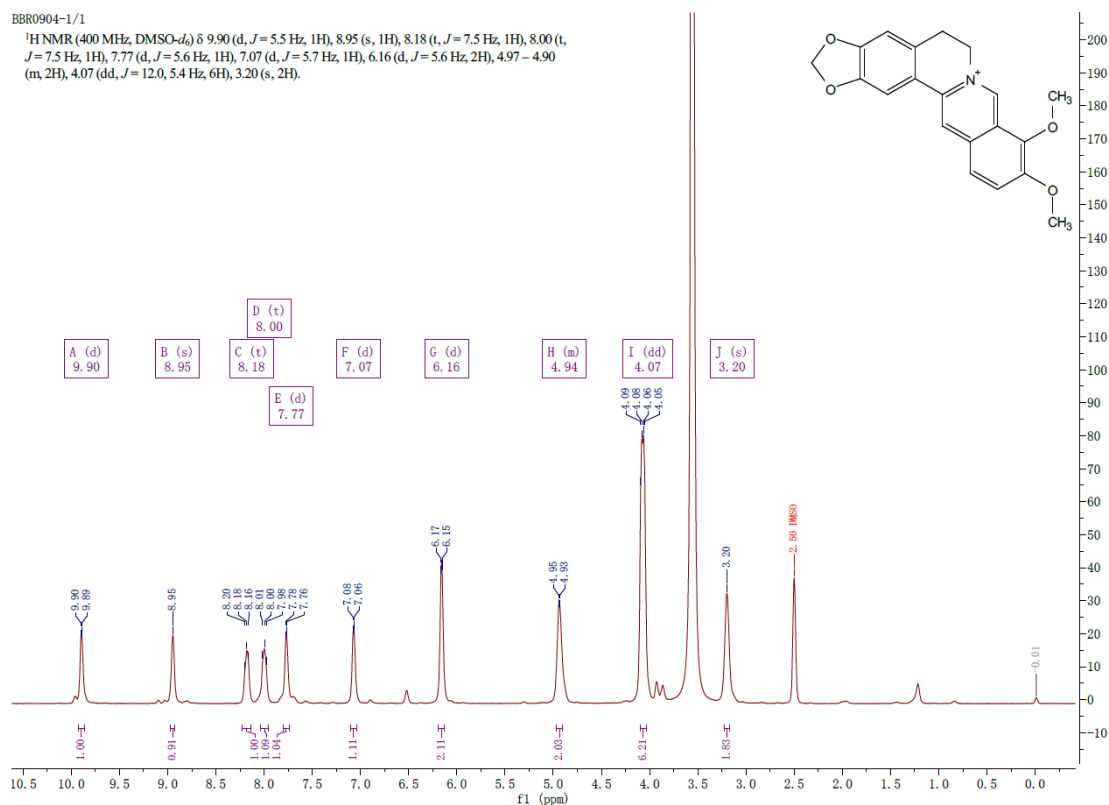

Figure S 11  $^1\text{H}$  NMR spectra of compound BBR

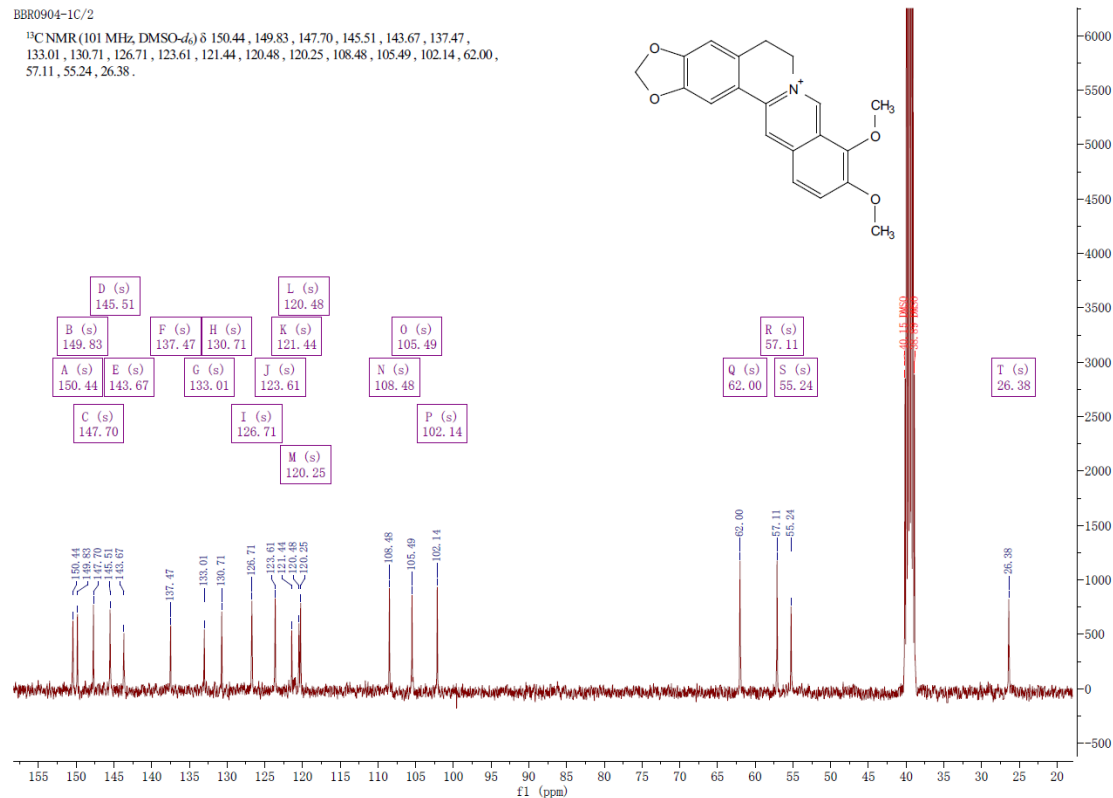

Figure S 12  $^{13}\text{C}$  NMR spectra of compound BBR

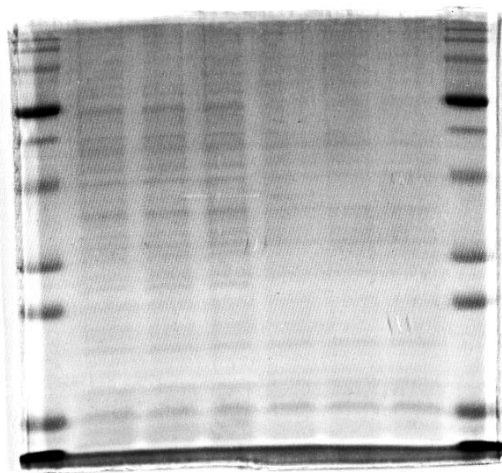

Figure S 13 Western blot images for PBS-B9OC

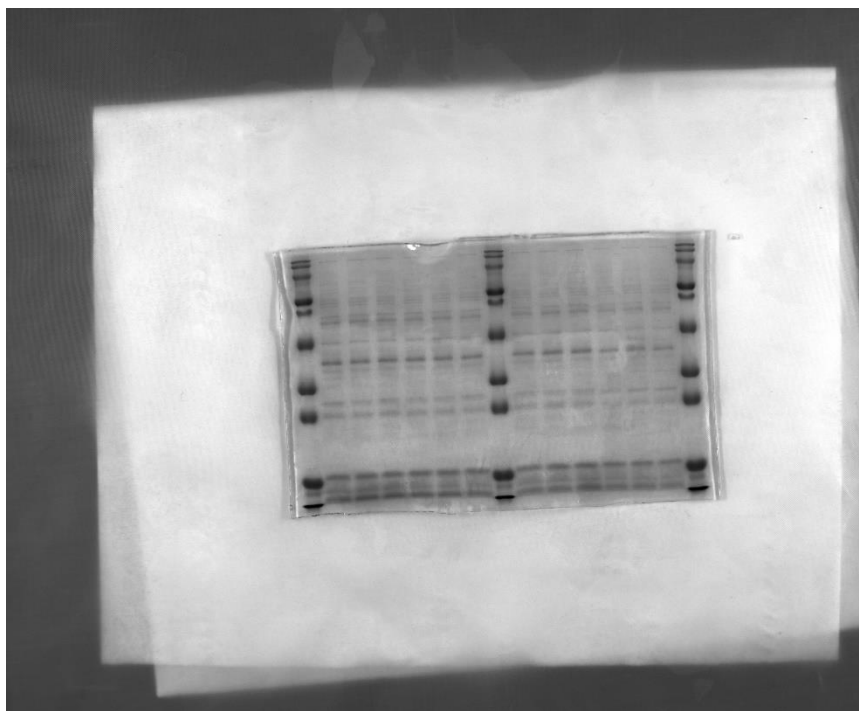

Figure S 14 Western blot images for PBS-BBR-CAN-BBR+CAN



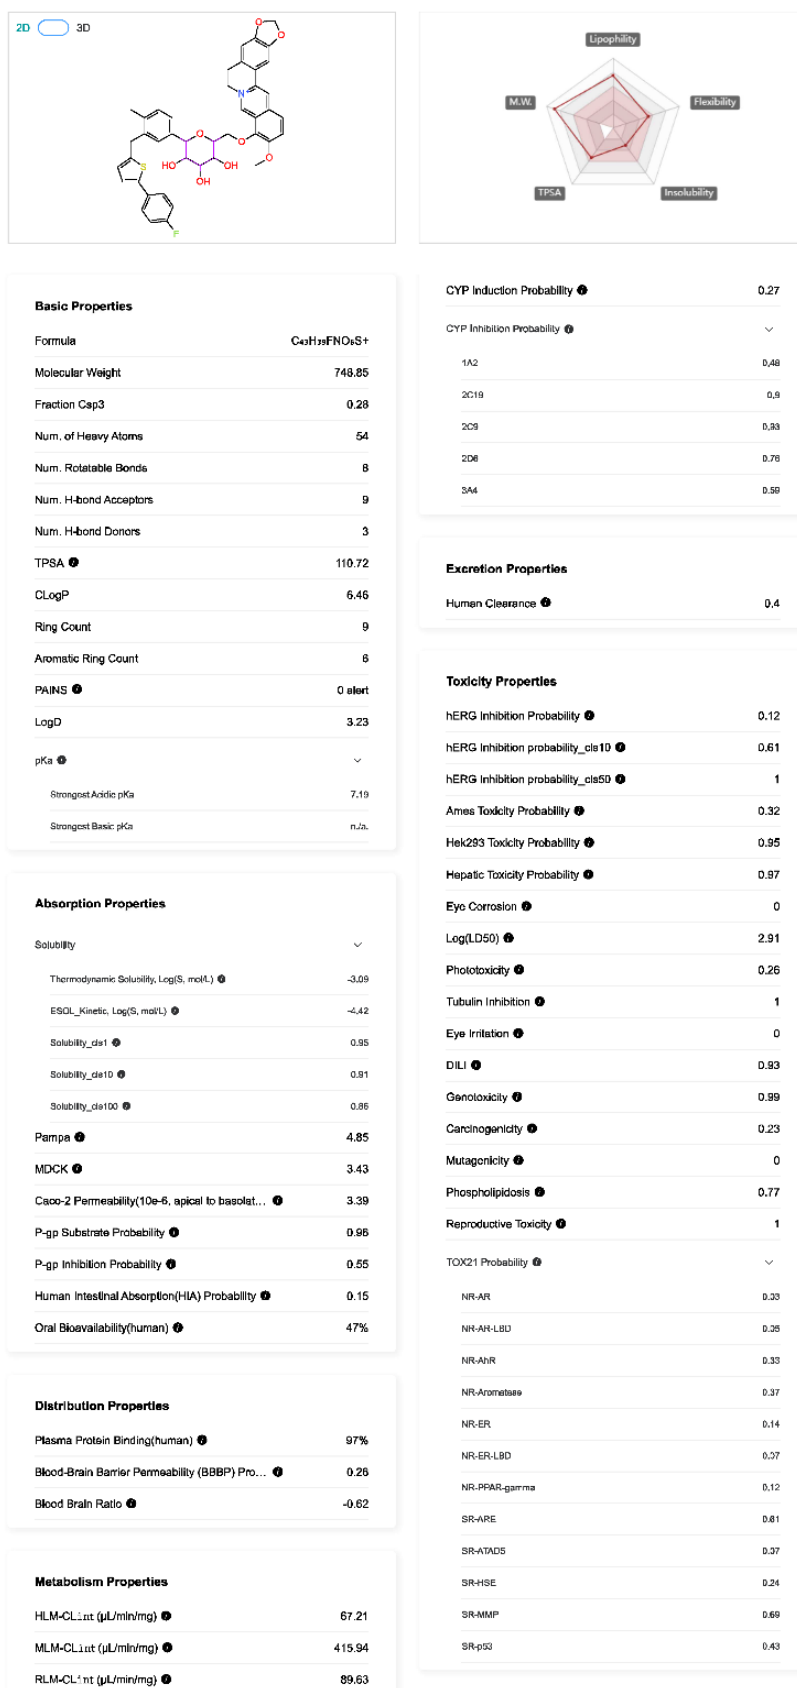

Figure S 15 ADMET Prediction of B9OC Based on Computer Aided
